# Supplementary material for: Intracellular reduction/activation of a disulfide switch in thiosemicarbazone iron chelators
Source: Royal Society of Chemistry journal article supplement (doi:10.1039/c4mt00153b), 2014-08-07
Supplement: c4mt00153b1.pdf [file c4mt00153b1.pdf]

## Supporting Information

### **Intracellular reduction/activation of a disulfide switch in thiosemicarbazone iron chelators**

Eman A. Akam, Tsuhen M. Chang, Andrei V. Astashkin and Elisa Tomat\*

#### *Contents*

|            |                                                                                                          |
|------------|----------------------------------------------------------------------------------------------------------|
| Fig. S1    | Control experiment for calcein displacement assay                                                        |
| Fig. S2–S3 | Whole-cell EPR supplementary data                                                                        |
| Table S1   | Cytotoxicity of iron complex [(TC1-S) <sub>2</sub> Fe][BF <sub>4</sub> ] in SK-N-MC and MDA-MB-231 cells |

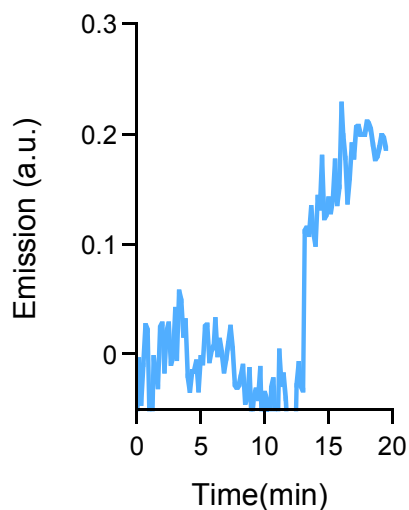

**Fig. S1.** Calcein fluorescence emission upon addition of DMSO at 5 min and then SIH (50  $\mu$ M) at 13 min in suspended Jurkat cell cultures. Fluorescence intensity at 517 nm (excitation, 488 nm) is plotted as the difference from the initial values before any addition.

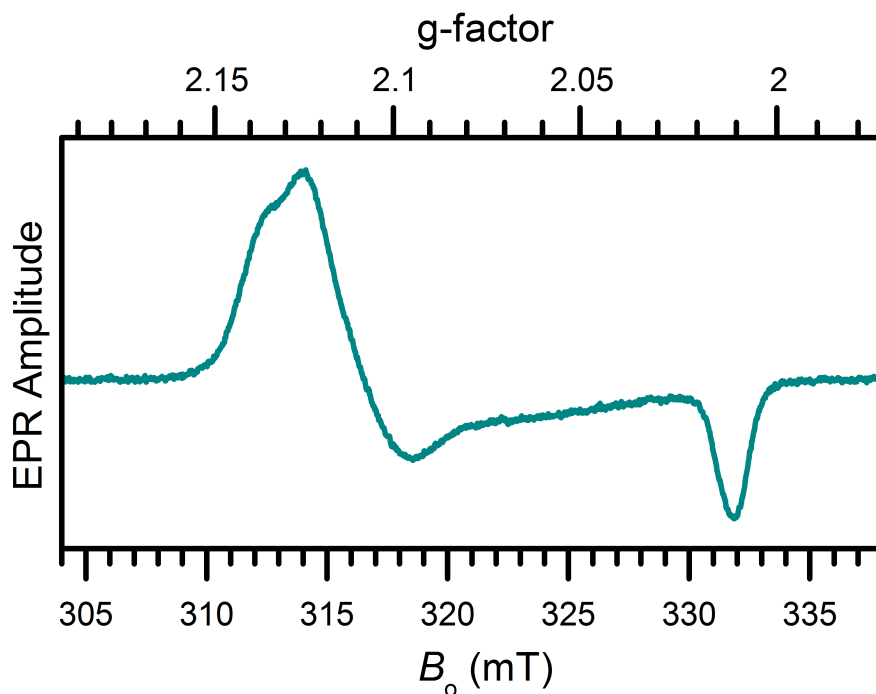

**Fig. S2.** EPR spectrum of the synthetic complex  $[(TC1-S)_2Fe^{III}][BF_4]$  in DMSO. Experimental conditions: microwave frequency, 9.339 GHz; microwave power, 20  $\mu$ W; magnetic field modulation amplitude, 0.2 mT; temperature, 6 K.

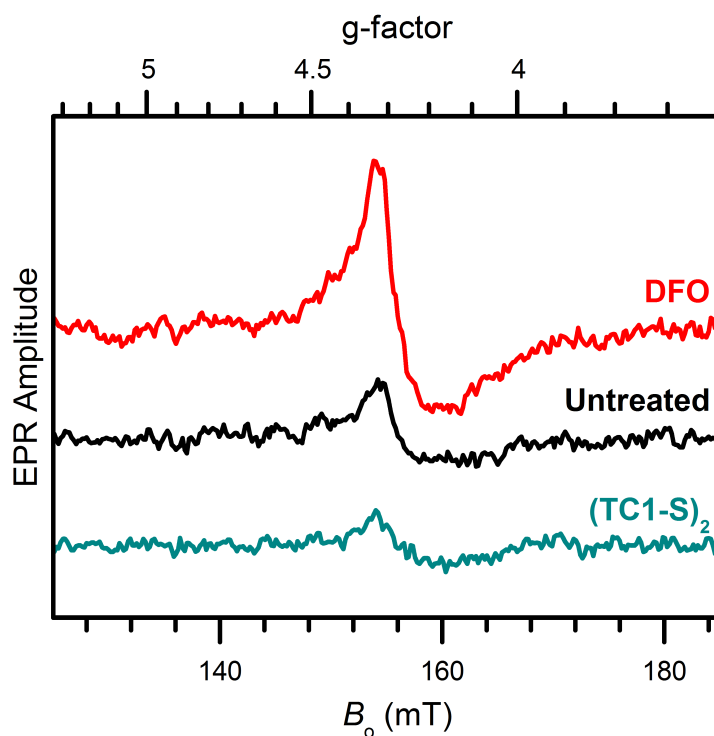

**Fig. S3.**  $g \sim 4$  region of the EPR spectra of intact Jurkat cells. Black, untreated cells; red, after treatment with 50  $\mu\text{M}$  DFO for 3 hours; green, after treatment with 50  $\mu\text{M}$  (TC1-S)<sub>2</sub> for 1 hour. Experimental conditions: microwave frequency, 9.338 GHz; microwave power, 20 mW; magnetic field modulation amplitude, 0.5 mT; temperature, 10 K.

| Compound                               | IC <sub>50</sub> ( $\mu\text{M}$ ), 48 h |                  |
|----------------------------------------|------------------------------------------|------------------|
|                                        | SK-N-MC                                  | MDA-MB-231       |
| (TC1-S) <sub>2</sub> <sup>a</sup>      | 6.81 $\pm$ 0.17                          | 4.59 $\pm$ 0.06  |
| TC1-SH <sup>a</sup>                    | 5.19 $\pm$ 0.17                          | 15.01 $\pm$ 0.05 |
| [(TC1-S) <sub>2</sub> Fe] <sup>+</sup> | 42.07 $\pm$ 0.14                         | 30.63 $\pm$ 0.05 |

**Table S1.** Antiproliferative activity of iron complex [(TC1-S)<sub>2</sub>Fe]<sup>+</sup> compared to the free prochelator and chelator systems in SK-N-MC (neuroepithelioma) and MDA-MB-231 (breast adenocarcinoma) cell cultures. IC<sub>50</sub> values were determined from MTT assays after exposure to tested compounds for 48 h; (a) data from: T. M. Chang and E. Tomat, *Dalton Trans.*, 2013, **42**, 7846-7849.
